# Supplementary material for: A Novel Deoxyribonuclease Low-Molecular-Weight Bacteriocin, Carocin S4, from Pectobacterium carotovorum subsp. carotovorum
Source: MDPI journal article supplement (doi:10.3390/microorganisms11071854), 2023-07-22
Supplement: s1 [file s1]

Supplementary Figure S4

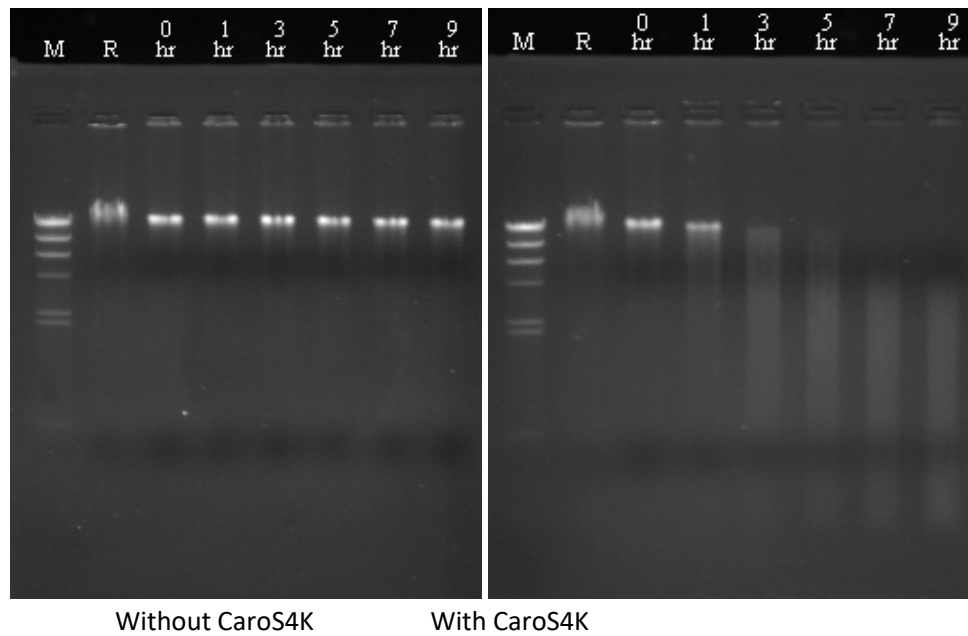

Supplementary Figure S4. Genomic DNA of 95F3 reacts with CaroS4K for different lengths of time.

The 1 mM  $\text{Ca}^{2+}$  buffer containing genomic DNA of 95F3 (100 ng) was incubated with or without CaroS4K (1  $\mu\text{M}$ ) for different time at 28°C. The reaction time was increased from 0 to 9 hours as indicated on the top of each lane.

M :  $\lambda$ DNA /Hind III.    R : genomic DNA of 95F3 (100 ng).
