# Supplementary material for: A Novel Deoxyribonuclease Low-Molecular-Weight Bacteriocin, Carocin S4, from Pectobacterium carotovorum subsp. carotovorum
Source: MDPI journal article supplement (doi:10.3390/microorganisms11071854), 2023-07-22
Supplement: s1 [file s1]

Supplementary Figure S3

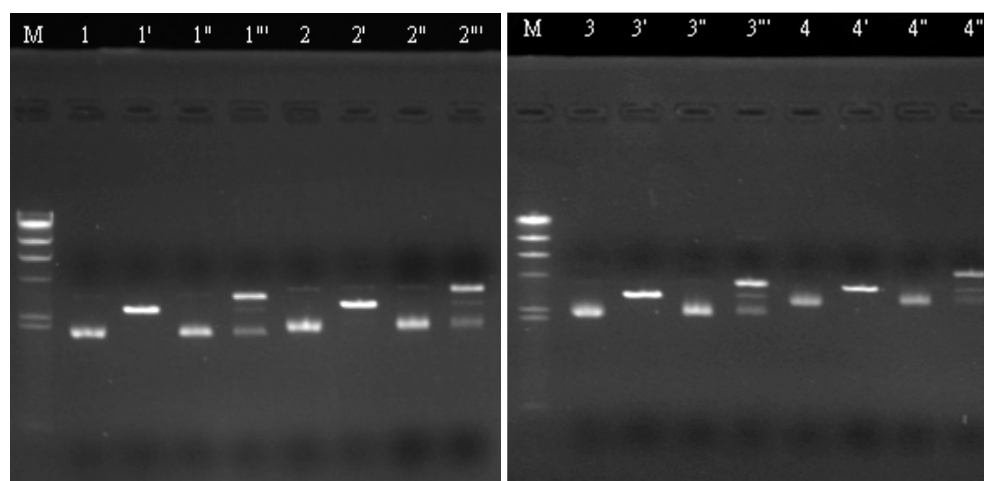

Supplementary Figure S3. Mass DNA (pMCL200, pGEM-4Z, pBluescript and pQE30) reacts with CaroS4K.

(28°C/60 min)

M:  $\lambda$ DNA / *Hind* III.

1 : pMCL200 (100 ng).

1' : pMCL200 / *Sac* I.

1'' : pMCL200 (100 ng) in 10 mM  $\text{Ca}^{2+}$  buffer without CaroS4K (1 $\mu$ M) .

1''' : pMCL200 (100 ng) in 10 mM  $\text{Ca}^{2+}$  buffer with CaroS4K (1 $\mu$ M).

2 : pGEM-4Z (100 ng).

2' : pGEM-4Z / *Sac* I.

2'' : pGEM-4Z (100 ng) in 10 mM  $\text{Ca}^{2+}$  buffer without CaroS4K (1 $\mu$ M).

2''' : pGEM-4Z (100 ng) in 10 mM  $\text{Ca}^{2+}$  buffer with CaroS4K (1 $\mu$ M).

3 : pBluescript (100 ng).

3' : pBluescript / *Bsa* AI.

3'' : pBluescript (100 ng) in 10 mM  $\text{Ca}^{2+}$  buffer without CaroS4K (1 $\mu$ M).

3''' : pBluescript (100 ng) in 10 mM  $\text{Ca}^{2+}$  buffer with CaroS4K (1 $\mu$ M).

4 : pQE30 (100 ng).

4' : pQE30 / *Sac* I.

4'' : pQE30 (100 ng) in 10 mM  $\text{Ca}^{2+}$  buffer without CaroS4K (1 $\mu$ M).

4''' : pQE30 (100 ng) in 10 mM  $\text{Ca}^{2+}$  buffer with CaroS4K (1 $\mu$ M).
