# Supplementary material for: A Novel Deoxyribonuclease Low-Molecular-Weight Bacteriocin, Carocin S4, from Pectobacterium carotovorum subsp. carotovorum
Source: MDPI journal article supplement (doi:10.3390/microorganisms11071854), 2023-07-22
Supplement: s1 [file s1]

**Supplementary Table S2: Primers used in the study**

| Name             | Sequence (5'→3')                             |
|------------------|----------------------------------------------|
| PF-1             | 5'AGAGAACACAGATTTAGCCCAGTCGG 3'              |
| PF-2             | 5'CCGCACGATGAAGAGCAGAAGTTAT3'                |
| PF-3             | 5'GATCCTGGAAAACGGGAAAGG TTC3'                |
| PR-1             | 5'GCCGAAGAGAACACAGATTTAGCCCA3'               |
| PR-2             | 5'CCGCACGATGAAGAGCAGAAGTT3'                  |
| PR-3             | 5'CAGATCTCTGGAAAACGGGAAAGG3'                 |
| N1               | 5'NGTCGASWGANAWGAA3'                         |
| N2               | 5'GTNCGASWCANAWGTT3'                         |
| N3               | 5'WGTGNAGWANCANAGA3'                         |
| P3               | 5'CTCGACGTTGTCACTGAAGCGGGAAG3'               |
| P4               | 5'AAAGCACGAGGAAGCGGTCAGCCCAT3'               |
| TO6K-sens13      | 5'CAGATGATGCAGAGCATT CAGG3'                  |
| TO6I-anti7       | 5'GGCCGATGCTGGTTTTGTGGT3'                    |
| TO6-sens3        | 5'GGTGATGATTGACCGTCTTGAGAG3'                 |
| Carocin S4KI_for | 5'GGATCCATGATTAAATACCG 3'                    |
| Carocin S4KI_rev | 5'GAGCTCTTAGAGACCGTAT 3'                     |
| 5IHT32a2KI_forT  | 5'GAAGGAGATATACATATGATTAAAGTACCGTTTATA 3'    |
| 5IHTGT2KI_forS   | 5'ATGATTAAAGTACCGTTTATA 3'                   |
| 5IHT32a3KI_revT  | 5' ATGTATATCTCCTTCTTAAAGTTAAACAAAATTATTTC 3' |
| 5IHT32a4KI_revS  | 5'TTAAAGTTAAACAAAATTATTTC 3'                 |
| X4I_forT         | 5'GAAGGAGATATACATATGATTAAATTTAAGGCAATG 3'    |
| X4I_forS         | 5'ATGATTAAATTTAAGGCAATG 3'                   |
| Carocin S4KI_for | 5'GGATCCATGATTAAATACCG 3'                    |
| Carocin S4KI_rev | 5'GAGCTCTTAGAGACCGTAT 3'                     |
| 5IHT32a2KI_forT  | 5'GAAGGAGATATACATATGATTAAAGTACCGTTTATA 3'    |
| 5IHTGT2KI_forS   | 5'ATGATTAAAGTACCGTTTATA 3'                   |
