# Supplementary material for: A Novel Deoxyribonuclease Low-Molecular-Weight Bacteriocin, Carocin S4, from Pectobacterium carotovorum subsp. carotovorum
Source: MDPI journal article supplement (doi:10.3390/microorganisms11071854), 2023-07-22
Supplement: s1 [file s1]

Supplementary Figure S1

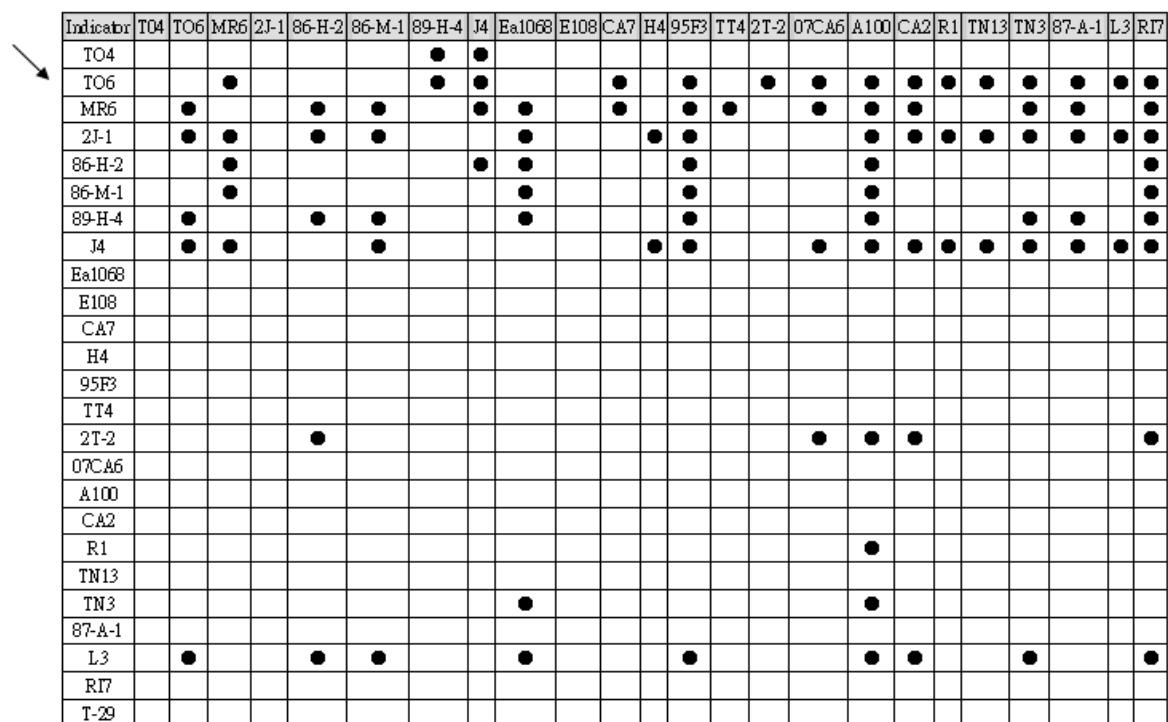

| Indicator | TO4 | TO6 | MR6 | 2J-1 | 86-H-2 | 86-M-1 | 89-H-4 | J4 | Ea1068 | E108 | CA7 | H4 | 95F3 | TT4 | 2T-2 | 07CA6 | A100 | CA2 | R1 | TN13 | TN3 | 87-A-1 | L3 | RI7 |
|-----------|-----|-----|-----|------|--------|--------|--------|----|--------|------|-----|----|------|-----|------|-------|------|-----|----|------|-----|--------|----|-----|
| TO4       |     |     |     |      |        |        | ●      | ●  |        |      |     |    |      |     |      |       |      |     |    |      |     |        |    |     |
| TO6       |     |     | ●   |      |        |        | ●      | ●  |        |      | ●   |    | ●    |     | ●    | ●     | ●    | ●   | ●  | ●    | ●   | ●      | ●  | ●   |
| MR6       |     | ●   |     |      | ●      | ●      |        | ●  | ●      |      | ●   |    | ●    | ●   |      | ●     | ●    | ●   | ●  |      | ●   | ●      | ●  | ●   |
| 2J-1      |     | ●   | ●   |      | ●      | ●      |        |    | ●      |      |     | ●  | ●    |     |      |       | ●    | ●   | ●  | ●    | ●   | ●      | ●  | ●   |
| 86-H-2    |     |     | ●   |      |        |        |        | ●  | ●      |      |     |    | ●    |     |      |       | ●    |     |    |      |     |        |    | ●   |
| 86-M-1    |     |     | ●   |      |        |        |        |    | ●      |      |     |    | ●    |     |      |       | ●    |     |    |      |     |        |    | ●   |
| 89-H-4    |     | ●   |     |      | ●      | ●      |        |    | ●      |      |     |    | ●    |     |      |       | ●    |     |    |      | ●   | ●      | ●  | ●   |
| J4        |     | ●   | ●   |      |        | ●      |        |    |        |      |     | ●  | ●    |     |      | ●     | ●    | ●   | ●  | ●    | ●   | ●      | ●  | ●   |
| Ea1068    |     |     |     |      |        |        |        |    |        |      |     |    |      |     |      |       |      |     |    |      |     |        |    |     |
| E108      |     |     |     |      |        |        |        |    |        |      |     |    |      |     |      |       |      |     |    |      |     |        |    |     |
| CA7       |     |     |     |      |        |        |        |    |        |      |     |    |      |     |      |       |      |     |    |      |     |        |    |     |
| H4        |     |     |     |      |        |        |        |    |        |      |     |    |      |     |      |       |      |     |    |      |     |        |    |     |
| 95F3      |     |     |     |      |        |        |        |    |        |      |     |    |      |     |      |       |      |     |    |      |     |        |    |     |
| TT4       |     |     |     |      |        |        |        |    |        |      |     |    |      |     |      |       |      |     |    |      |     |        |    |     |
| 2T-2      |     |     |     |      | ●      |        |        |    |        |      |     |    |      |     |      | ●     | ●    | ●   |    |      |     |        |    | ●   |
| 07CA6     |     |     |     |      |        |        |        |    |        |      |     |    |      |     |      |       |      |     |    |      |     |        |    |     |
| A100      |     |     |     |      |        |        |        |    |        |      |     |    |      |     |      |       |      |     |    |      |     |        |    |     |
| CA2       |     |     |     |      |        |        |        |    |        |      |     |    |      |     |      |       |      |     |    |      |     |        |    |     |
| R1        |     |     |     |      |        |        |        |    |        |      |     |    |      |     |      |       | ●    |     |    |      |     |        |    |     |
| TN13      |     |     |     |      |        |        |        |    |        |      |     |    |      |     |      |       |      |     |    |      |     |        |    |     |
| TN3       |     |     |     |      |        |        |        |    | ●      |      |     |    |      |     |      |       | ●    |     |    |      |     |        |    |     |
| 87-A-1    |     |     |     |      |        |        |        |    |        |      |     |    |      |     |      |       |      |     |    |      |     |        |    |     |
| L3        |     | ●   |     |      | ●      | ●      |        |    | ●      |      |     |    | ●    |     |      |       | ●    | ●   |    |      | ●   |        |    | ●   |
| RI7       |     |     |     |      |        |        |        |    |        |      |     |    |      |     |      |       |      |     |    |      |     |        |    |     |
| T-29      |     |     |     |      |        |        |        |    |        |      |     |    |      |     |      |       |      |     |    |      |     |        |    |     |

Cross-comparison of the bacteriocin activity of each strain against other indicator strains. Each dot (●) indicates that the bacteriocin produced by the strain has observable inhibition on the production of the bacteriocin of the indicator strain.
