# Supplementary material for: A Novel Deoxyribonuclease Low-Molecular-Weight Bacteriocin, Carocin S4, from Pectobacterium carotovorum subsp. carotovorum
Source: MDPI journal article supplement (doi:10.3390/microorganisms11071854), 2023-07-22
Supplement: s1 [file s1]

Supplementary Figure S2

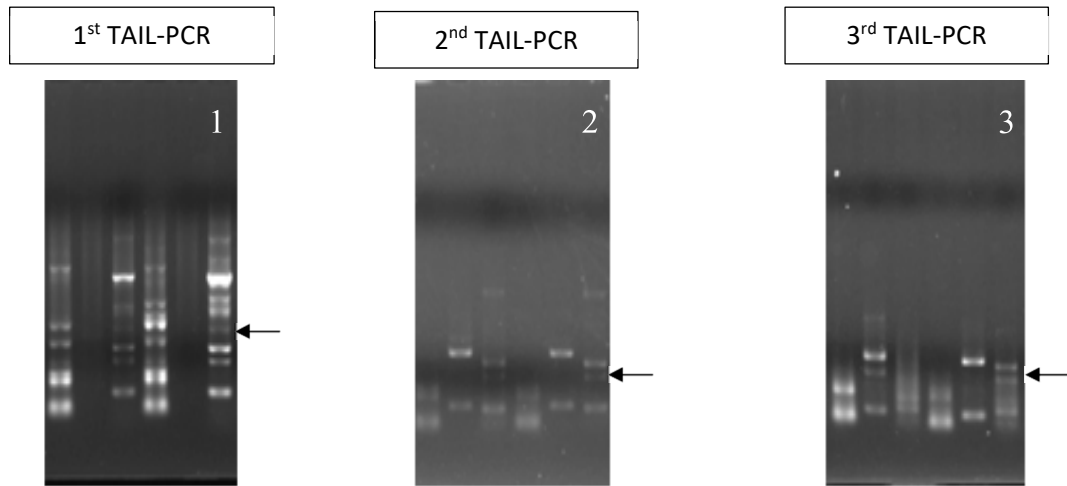

Using TAIL-PCR, the unidentified sequence fragments of the specific primer and the random primer are amplified. The DNA of the primary product became shorter following three TAIL-PCRs. (1) 1<sup>st</sup> TAIL-PCR; (2) 2<sup>nd</sup> TAIL-PCR; and (3) 3<sup>rd</sup> TAIL-PCR.
