# Supplementary material for: A Novel Deoxyribonuclease Low-Molecular-Weight Bacteriocin, Carocin S4, from Pectobacterium carotovorum subsp. carotovorum
Source: MDPI journal article supplement (doi:10.3390/microorganisms11071854), 2023-07-22
Supplement: s1 [file s1]

Supplementary Figure S7

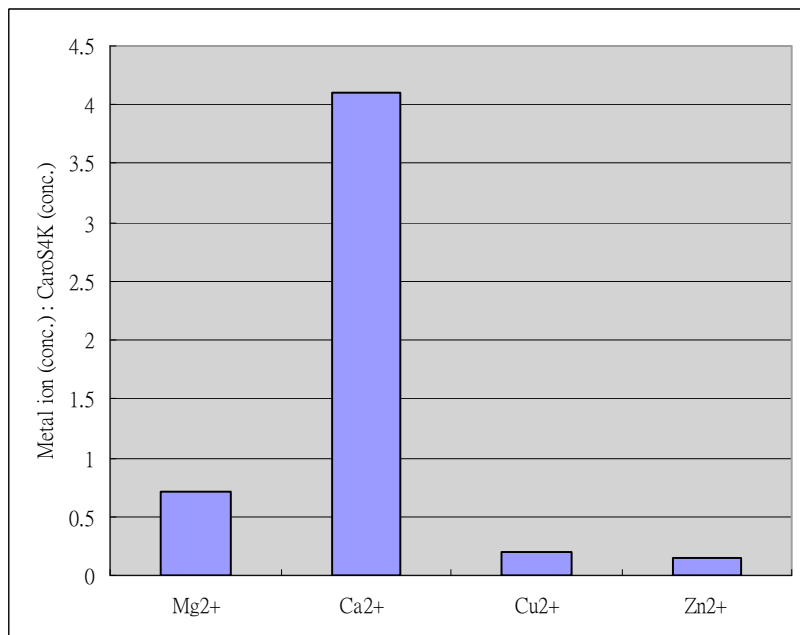

Supplementary Figure S7. CaroS4K vs. concentration ratio of major metal ions (Mg<sup>2+</sup>, Ca<sup>2+</sup>, Cu<sup>2+</sup> and Zn<sup>2+</sup>).
