# Supplementary material for: A Novel Deoxyribonuclease Low-Molecular-Weight Bacteriocin, Carocin S4, from Pectobacterium carotovorum subsp. carotovorum
Source: MDPI journal article supplement (doi:10.3390/microorganisms11071854), 2023-07-22
Supplement: s1 [file s1]

**Supplementary Table S1.** Bacteria and plasmids used in the study.

| Strain or plasmid                                                  | Description                                                                                                                             | Source           |
|--------------------------------------------------------------------|-----------------------------------------------------------------------------------------------------------------------------------------|------------------|
| <b><i>Escherichia coli</i></b>                                     |                                                                                                                                         |                  |
| 1830                                                               | <i>pro<sup>-</sup> met<sup>-</sup> Kan<sup>r</sup> Nm<sup>r</sup></i> , containing transposon <i>Tn5</i> on the suicidal plasmid pBJ4JI | [19]             |
| DH5α                                                               | supE44ΔlacU169(Φ80lacZΔM15) hsdR17recA1 gyrA96thi-1relA1                                                                                | [20]             |
| BL21(DE3)                                                          | hsdS gal(λclts857 <i>ind1</i> Sam7 <i>nin5</i> lacUV5-T7 gene 1)                                                                        | [21]             |
| <b><i>Pectobacterium carotovorum</i> subsp. <i>carotovorum</i></b> |                                                                                                                                         |                  |
| TO-6                                                               | Pcc, wild-type                                                                                                                          | Laboratory stock |
| Rif-TO6                                                            | TO-6, Rif <sup>r</sup> , wild-type                                                                                                      | This study       |
| TT6-3                                                              | Rif-TO6, <i>CarocinS4::Tn5</i> , Rif <sup>r</sup> , Kan <sup>r</sup>                                                                    | This study       |
| TT6-13                                                             | Rif-TO6, <i>CarocinS4::Tn5</i> , Rif <sup>r</sup> , Kan <sup>r</sup>                                                                    | This study       |
| TT6-21                                                             | Rif-TO6, <i>CarocinS4::Tn5</i> , Rif <sup>r</sup> , Kan <sup>r</sup>                                                                    | This study       |
| 95F-3                                                              | Pcc, wild-type                                                                                                                          | Laboratory stock |
| <b>Plasmid</b>                                                     |                                                                                                                                         |                  |
| pMCL210                                                            | p15A, Cml <sup>r</sup> , Low copy number                                                                                                | [22]             |
| pBR322                                                             | Amp <sup>r</sup> ; Tet <sup>r</sup>                                                                                                     | Promega          |
| pGEM-T Easy                                                        | Amp <sup>r</sup> ; lacZ, TA-cloning vector                                                                                              | Promega          |
| pCRII-nptII                                                        | Amp <sup>r</sup> ; Kan <sup>r</sup>                                                                                                     | Laboratory stock |
| pET32a                                                             | Amp <sup>r</sup> ; expression vector with the N-terminal His-tag                                                                        | Novagen          |
| pGS4KI                                                             | 3032 bp DNA fragment harboring <i>caroS4K</i> and <i>caroS4I</i> genes from TO-4 genome, cloned into pGEM-T Easy Vector                 | This study       |
| pGS4I                                                              | 654 bp DNA fragment harboring <i>caroS4I</i> gene from TO-4 genome, cloned into pGEM-T Easy Vector                                      | This study       |
| pES4KI                                                             | <i>caroS4K</i> and <i>caroS4I</i> subcloned into pET32a                                                                                 | This study       |
| pES4I                                                              | <i>caroS4I</i> subcloned into pET32a                                                                                                    | This study       |

Kan<sup>r</sup>: Kanamycin; Cml<sup>r</sup>: Chloramphenicol; Rif<sup>r</sup>: Rifampicin; Amp<sup>r</sup>: Ampicillin.
