# Supplementary material for: A Novel Deoxyribonuclease Low-Molecular-Weight Bacteriocin, Carocin S4, from Pectobacterium carotovorum subsp. carotovorum
Source: MDPI journal article supplement (doi:10.3390/microorganisms11071854), 2023-07-22
Supplement: s1 [file s1]

# Supplementary Figure S5

CaroS4K : MIKYRLYAPNDGDTMTVDGGGGGWVSNDDRKGGNDRNNDKGSSAVDYGKNPEKQTVINPYLFFAIPPAVYLI : 72  
CaroS1K : ----- : -

CaroS4K : DDVWGFTFNTAAIEVGLKKVADFALKATPVAGRLVGILGAIMPSDIAPDSIDPVFNMGQQTMAQMAAQLAA : 144  
CaroS1K : ----- : -

CaroS4K : QKGVNPNGYSVTAMPADLVSSLPVSEISSLPAPTAPASLLAQSVINTELRRQLTLTKPAVNAPVANIPVVKAE : 216  
CaroS1K : ----- : -

CaroS4K : KTAVPGVYSVKVIADKPAQIKLDKTPALAKNPPKVKDDVQVSSFLSSPVADTHHAFIDFGSDHEPVVYSL : 288  
CaroS1K : ----- : -

CaroS4K : SKIVTAEEEKKQVEEAKRREQEWLLRHPITAAERKLTETIHQVLSFAQQLKESSTATISEKTKTVAVYQEQVN : 360  
CaroS1K : ----- : -

CaroS4K : TAAKNRDNFYNQNRGLLSAGITGGPGYPYILALWQTMNNFHQAYFRANNALEQESHLLNQARSDLSKAEQLI : 432  
CaroS1K : ----- : -

CaroS4K : AENNLLQVETERMLAEKKEIKRNRVNVSTFGTVQTCSTLLSAFYAATSGSTASISQSVSGELASHLYKPK : 504  
CaroS1K : -----MRQCCRPQPVVMAGTA-AQAGAI-----AAAGAVACANQDA-AKATHTOMRRLS : 49  
42 R V GT Q 6 AA G A Q L 6 4

CaroS4K : G-MIGSCKIVGKDVILLESIPVKL-IPCYRS-----PTNLDLAKRNGNLDLPTLAE-SDENGERVLRAPK- : 568  
CaroS1K : GSIWQGLQMAQSFLLMGAILQHHLKGPADLLTPEKLLFAANKCGTWPSPRVRYQWMEDEETGR-LKAVGY : 120  
G I G 6 6L 6 6 G K P L A K G 6 6R 5 DE R L4A

CaroS4K : AGSLRVF-SSVRGVAGSYDKNTGIFSAEIDGVSSRLVLENEVEFPTGNVGNNGN-TAPDYKAILNTGVLDVKP : 638  
CaroS1K : HTSMESGRDQVRVRLIKYDFPNRNYAFWEEGAGGPTIILWTDNEMGMELEPDTAHGEQGVIPSAW-PCFEIPE : 191  
S6 VR YD 5 G 3 6L P P 1T P 6 G 6

CaroS4K : VDKITVTITPVADPVDILDDYIILWLPASGSGVDEPIYVWFNSNPFYGETNSKGRYSGRSFNTDKAGGAILNLDW : 710  
CaroS1K : MDVSIHATPMPEEKDFRDYIIVFENS---FPPIYIYLSKLPVNLLVD-LYS--NF-----IGRSRQGR- : 252  
6D 636 TP6 D DYI6 P S PIY6 P 1 YS F G Q 5

CaroS4K : KTANIDRAGVDKVKLHTGFAESDANKVMIDRLERIRGTLAVTDTDKRFYTHEIRLELYRNLGIRKGVVP : 782  
CaroS1K : QADHMPASAA--VRAYLRRLY-PDLRK---DKLEKMKKEVPAIL-IPTEIH-QKISETYGGRNSA--DNIEL : 314  
6 A VK R D K D4LE46 K A6 I E RN D 6

CaroS4K : SNQ---GEVWNTT-HT--ATLEDYKINERTESLYTPEAIKASEECIMRESQ----- : 827  
CaroS1K : DSQDLRGH-WIVILHAIRPQIKHGVTEEQLEIARDKMKRLNEEGGLY----- : 361  
Q G W H L 6 E L K EEQ 6

Supplementary Figure S5. CaroS4K is compared to caroS1K amino acid sequences.
